# Supplementary material for: LjNRT2.3 plays a hierarchical role in the control of high affinity transport system for root nitrate acquisition in Lotus japonicus
Source: Front Plant Sci. 2022 Nov 10;13:1042513. doi: 10.3389/fpls.2022.1042513 (PMC9687105; doi:10.3389/fpls.2022.1042513)
Supplement: Supplementary file 3 [file Table_1.xlsx]

## Sheet: Foglio1
Table S1
Oligonucleotides used in the present work
qRT-PCR
FwLjNRT2.3	5'-GGAGCAGCAGAAAGGATCAC-3'
RevLjNRT2.3	5'-GGTTGTGCTACAAGGGAGGA-3'
FwLjNRT2.1	5'-TAATGGATTCCCTGGCTGAA-3'
RevLjNRT2.1	5'-ATGGCAAAACCAACATGTGA-3'
FwLjNRT2.4	5'-GAGGCATGTTTTGTGGTCCT-3'
RevLjNRT2.4	5'-GCCATACAGGGTATAGGTTGG-3'
Genotyping of LORE1 lines
Fw30016697	5'-GCTTTGTTTCCAGTTTCGCCGCAG-3'
Rev30016697	5'-CCATCCGGCATGTCCTGACCAAAT-3'
Fw30078926	5'-TCCGCTTCTTCACCGGCTTCTCCT-3'
Rev30078926	5'-CCCCTCATTCCAAACCTCCTTGCC-3'
LORE1-P2	5'-CCATGGCGGTTCCGTGAATCTTAGG-3'
promoter-gusA fusion
FprLjNRT2.3-gusA	5'-GCGTCGACGCTAGATTCCTGTAAAGATGA-3'
RprLjNRT2.3-gusA	5'-CGGGATCCGGCAGATAAATTTGGGAGTTCA-3'
FprLjNRT2.1-gusA	5'-CCAAGCTTATCTCTCTGCTTAGGTTAAAGT-3'
RprLjNRT2.1-gusA	5'-CGGGATCCGCTTCCTGGAGATCCCTCAATC-3'
FprLjNAR2-gusA	5'-CGGTCGACCTGTGAACTAGTCTCCAACA-3'
RprLjNAR2-gusA	5'-CGGGATCCACAGAAGAGAAGTGATGCTA-3'
